# Supplementary material for: Racial and Ethnic Disparities in Outcomes Among Newborns with Congenital Diaphragmatic Hernia
Source: PubMed Central journal article supplement (PMC10148194; doi:10.1001/jamanetworkopen.2023.10800), 2023-04-28
Supplement: jamanetwopen-e2310800-s001.pdf [file jamanetwopen-e2310800-s001.pdf]

## Supplemental Online Content

Sferra SR, Salvi PS, Penikis AB, et al. Racial and ethnic disparities in outcomes among newborns with congenital diaphragmatic hernia. *JAMA Netw Open*. 2023;6(4):e2310800. doi:10.1001/jamanetworkopen.2023.10800

**eTable.** International Classification of Diseases (ICD), Ninth and Tenth Revision, Diagnosis and Procedure Codes Used to Acquire Patient Level Data in PHIS Database

This supplemental material has been provided by the authors to give readers additional information about their work.

**eTable.** *International Classification of Diseases (ICD), Ninth and Tenth Revision, Diagnosis and Procedure Codes Used to Acquire Patient Level Data in PHIS Database*

|                                | <i>ICD-9/10 codes</i>                                                                                                                                                                                                                                                          |
|--------------------------------|--------------------------------------------------------------------------------------------------------------------------------------------------------------------------------------------------------------------------------------------------------------------------------|
| Diagnosis codes for CDH        | <i>ICD-9-CM: 756.6<br/>ICD-10-CM: Q79.0/Q79.1</i>                                                                                                                                                                                                                              |
| Procedure codes for CDH repair | <i>ICD-9/10-PCS: 0BQT0ZZ;0BQT3ZZ;<br/>0BQT4ZZ;0BQR0ZZ; 0BQR3ZZ;0BUR4JZ;<br/>0BQR4ZZ;0BUR4KZ; 0BUR0JZ; 0BQS0ZZ;<br/>0BQS4ZZ; 0BQS3ZZ; 0BUS0JZ; 0BRT07Z;<br/>0BRT0JZ; 0BRT0KZ; 0BRT47Z; 0BRT4JZ;<br/>0BRT4KZ; 0BUT4JZ; 0BUT0JZ; 53.71; 53.72;<br/>53.75; 53.80; 53.83; 53.84</i> |

CDH = Congenital Diaphragmatic Hernia
