# Supplementary material for: Racial and Ethnic Disparities in Outcomes Among Newborns with Congenital Diaphragmatic Hernia
Source: PubMed Central journal article supplement (PMC10148194; doi:10.1001/jamanetworkopen.2023.10800), 2023-04-28
Supplement: jamanetwopen-e2310800-s002.pdf [file jamanetwopen-e2310800-s002.pdf]

## Data Sharing Statement

Sferra. Racial and Ethnic Disparities in Outcomes Among Newborns with Congenital Diaphragmatic Hernia. *JAMA Netw Open*. Published April 28, 2023.  
doi:10.1001/jamanetworkopen.2023.10800

### Data

**Data available:** No
